# Supplementary material
Source: Springer Nature journal article supplement (https://www.springermedizin.de/resource/supplementary/12985_2010_1057_MOESM4_ESM.pdf/9609050)

1

2

3

4

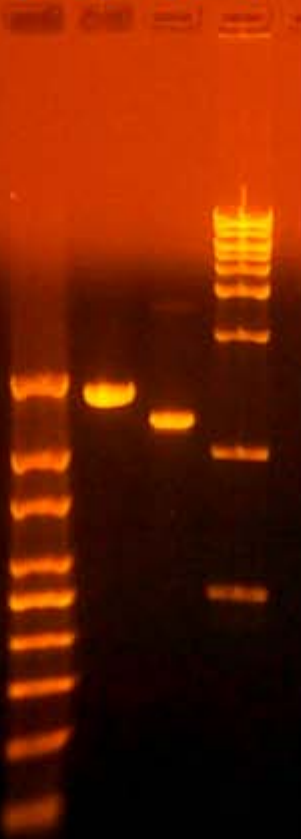

Supplement: MOESM4 [file 9609050]
